# Supplementary material for: Systematic simulation of the interactions of pleckstrin homology domains with membranes
Source: PubMed Central journal article supplement (PMC9258823; doi:10.1126/sciadv.abn6992), 2022-07-06
Supplement: sciadv.abn6992_sm.pdf [file sciadv.abn6992_sm.pdf]

Supplementary Materials for  
**Systematic simulation of the interactions of pleckstrin homology domains  
with membranes**

Kyle I. P. Le Huray *et al.*

Corresponding author: Antreas C. Kalli, [a.kalli@leeds.ac.uk](mailto:a.kalli@leeds.ac.uk)

*Sci. Adv.* **8**, eabn6992 (2022)  
DOI: 10.1126/sciadv.abn6992

**This PDF file includes:**

Figs. S1 to S12  
Table S1

**Fig. S1.**

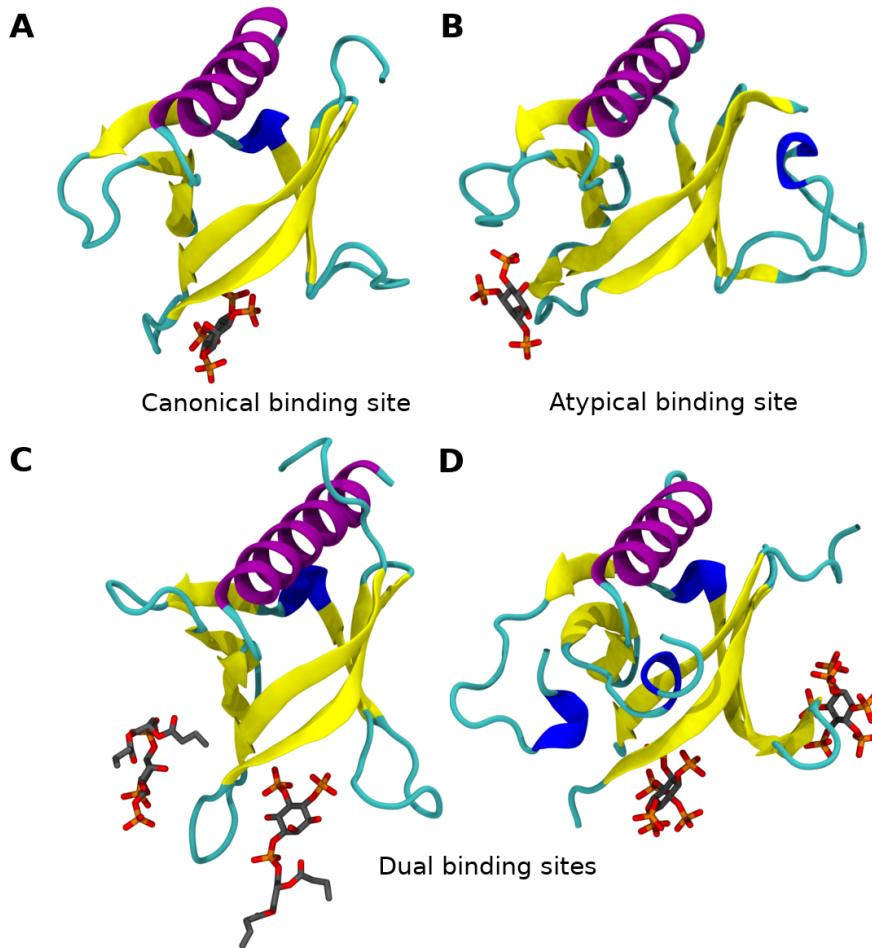

**Fig. S1. Example canonical and atypical phosphoinositide binding sites observed in PH domain crystal structures.** (A) Structure of the DAPP1 PH domain (PDB: 1fao), demonstrating inositol tetraphosphate bound at the canonical site. (B) Structure of the ArhGAP9 PH domain (PDB: 2p0h), with inositol trisphosphate bound at an atypical site on the outside of the barrel. (C) Structure of the Asap1 PH domain (PDB: 5c79), exhibiting dual binding of 04:0 PI(4,5)P<sub>2</sub> at both the canonical and an atypical site simultaneously. (D) Structure of the PH domain of BTK (PDB: 4y94), exhibiting dual binding of inositol hexakisphosphate to both the canonical site and an atypical site distinct from that of Asap1 or ArhGAP9.

**Fig. S2.**

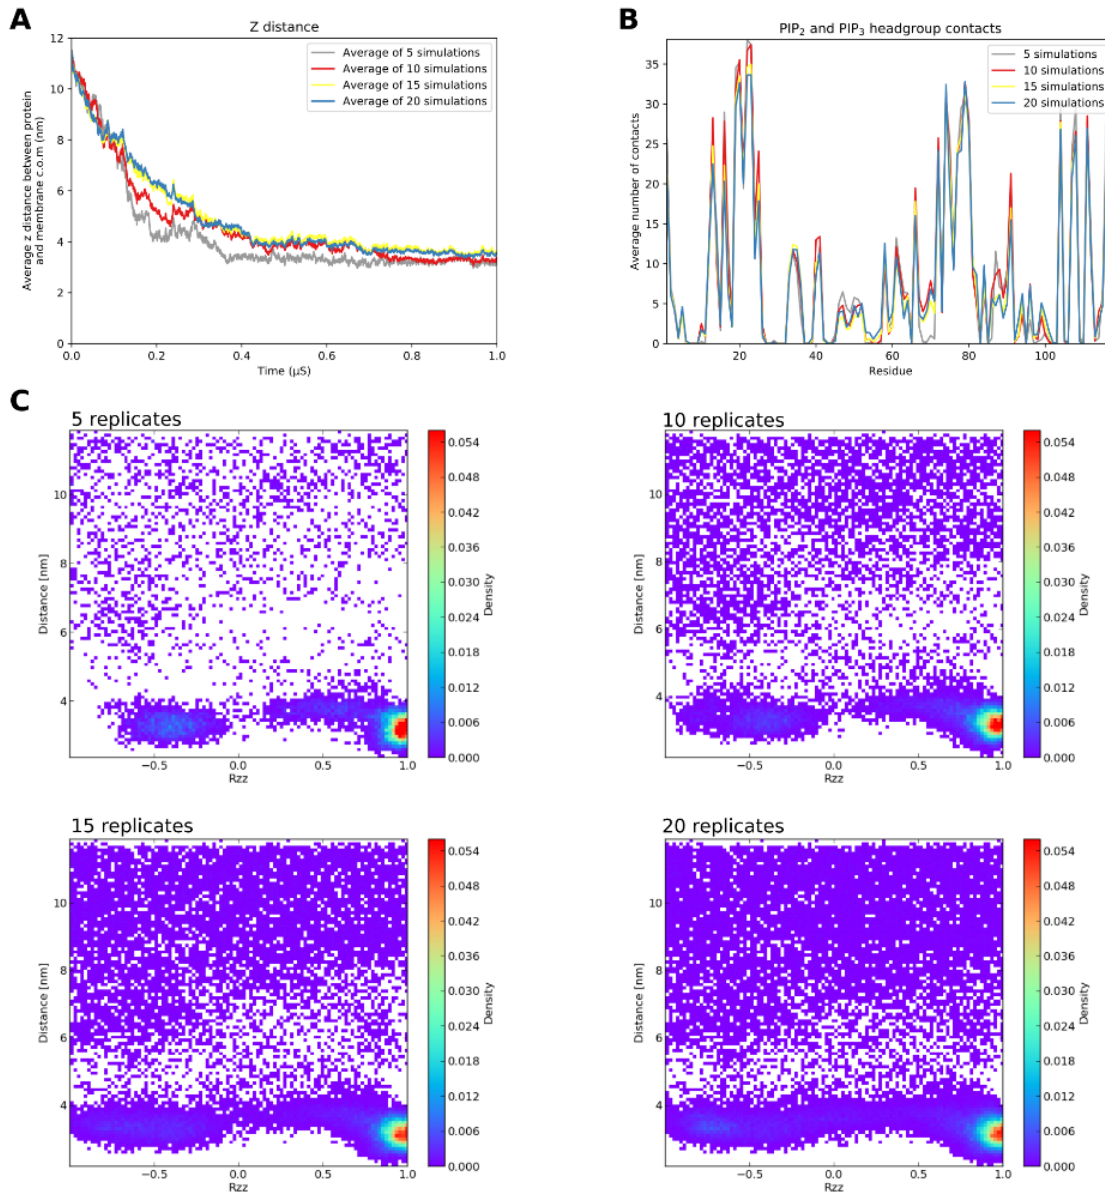

**Fig. S2. Convergence of simulation data.** Analysis of simulations for the BTK PH domain, using data from 5, 10, 15 and 20 replicates. 20 simulation replicates achieves convergence in: **(A)** protein-membrane z-axis distance over time, **(B)** contacts with PIP<sub>2</sub> and PIP<sub>3</sub> headgroups and **(C)** distance-rotation density analysis.

Fig. S3.

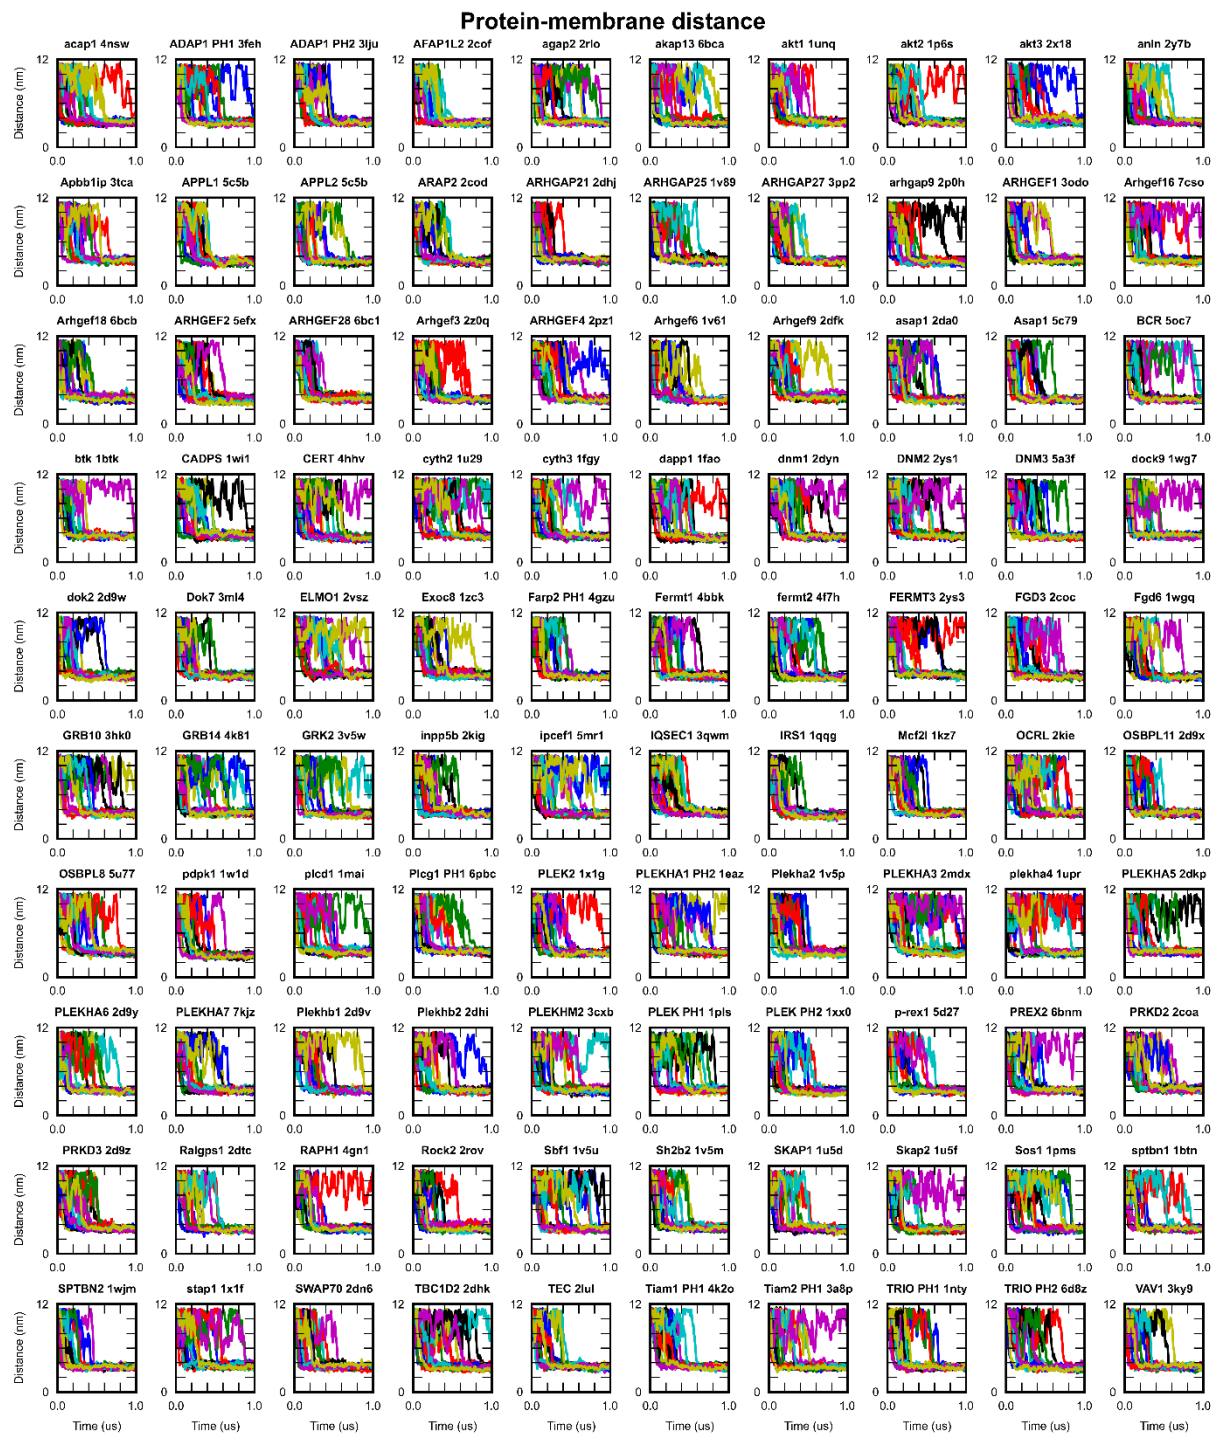

**Fig. S3. Z-axis distance between protein and membrane centres of mass during the simulation time course.** Data shown for all PH domain simulations, where each color represents the trajectory for an independent replicate. Membrane binding is observed at a distance of approximately 4 nm. Distances have been corrected to account for periodic boundary conditions.

Fig. S4.

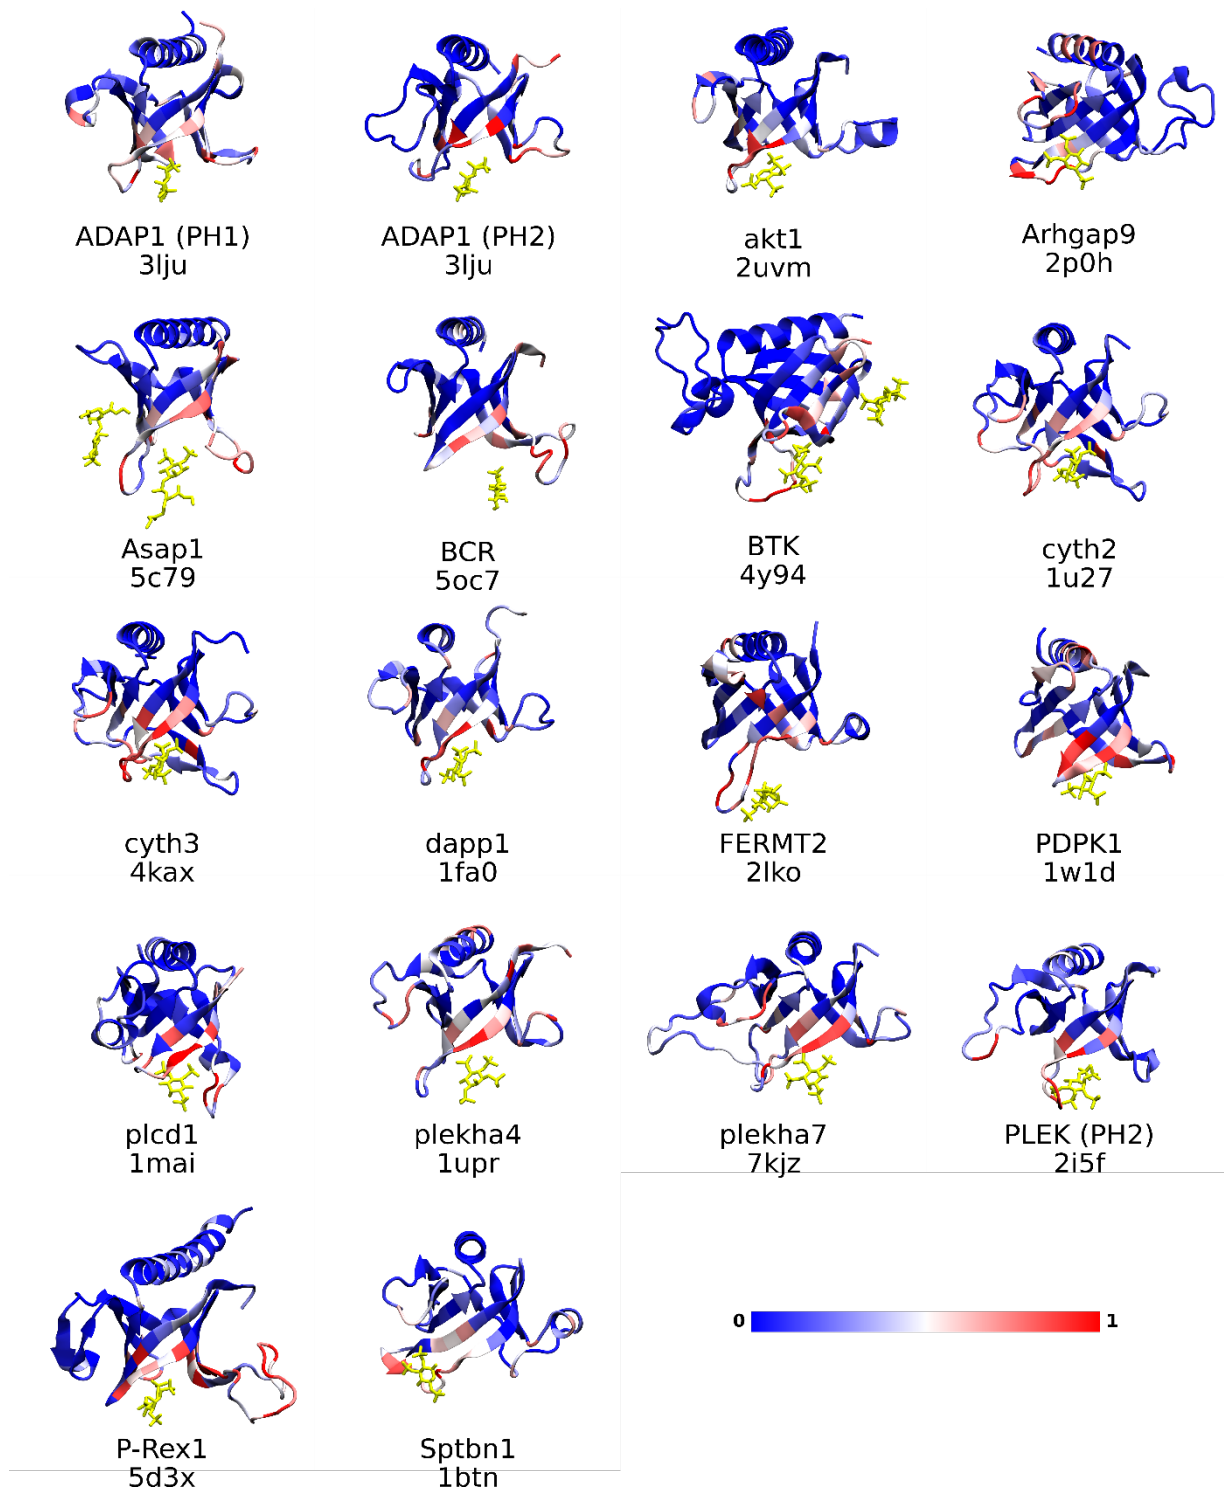

**Fig. S4. Comparison of simulated phosphoinositide interactions and crystallographic binding sites for 18 PH domains with crystallographic inositol binding sites.** Structures of 18 PH domains in complex with inositols (or analogues), in which each residue is colored according to the normalized number of contacts observed between the protein and PIP<sub>2</sub> and PIP<sub>3</sub> headgroups during the final 200 ns of simulation, averaged over 20 replicates. Normalization was carried out by dividing the number of contacts at every residue by the maximum number of contacts that any residue in that PH domain made with PIP headgroups. The position of the bound PIP headgroup

analogue in the PDB file of each structure is also shown in yellow stick representation. PDB IDs are shown below the protein name.

**Fig. S5.**

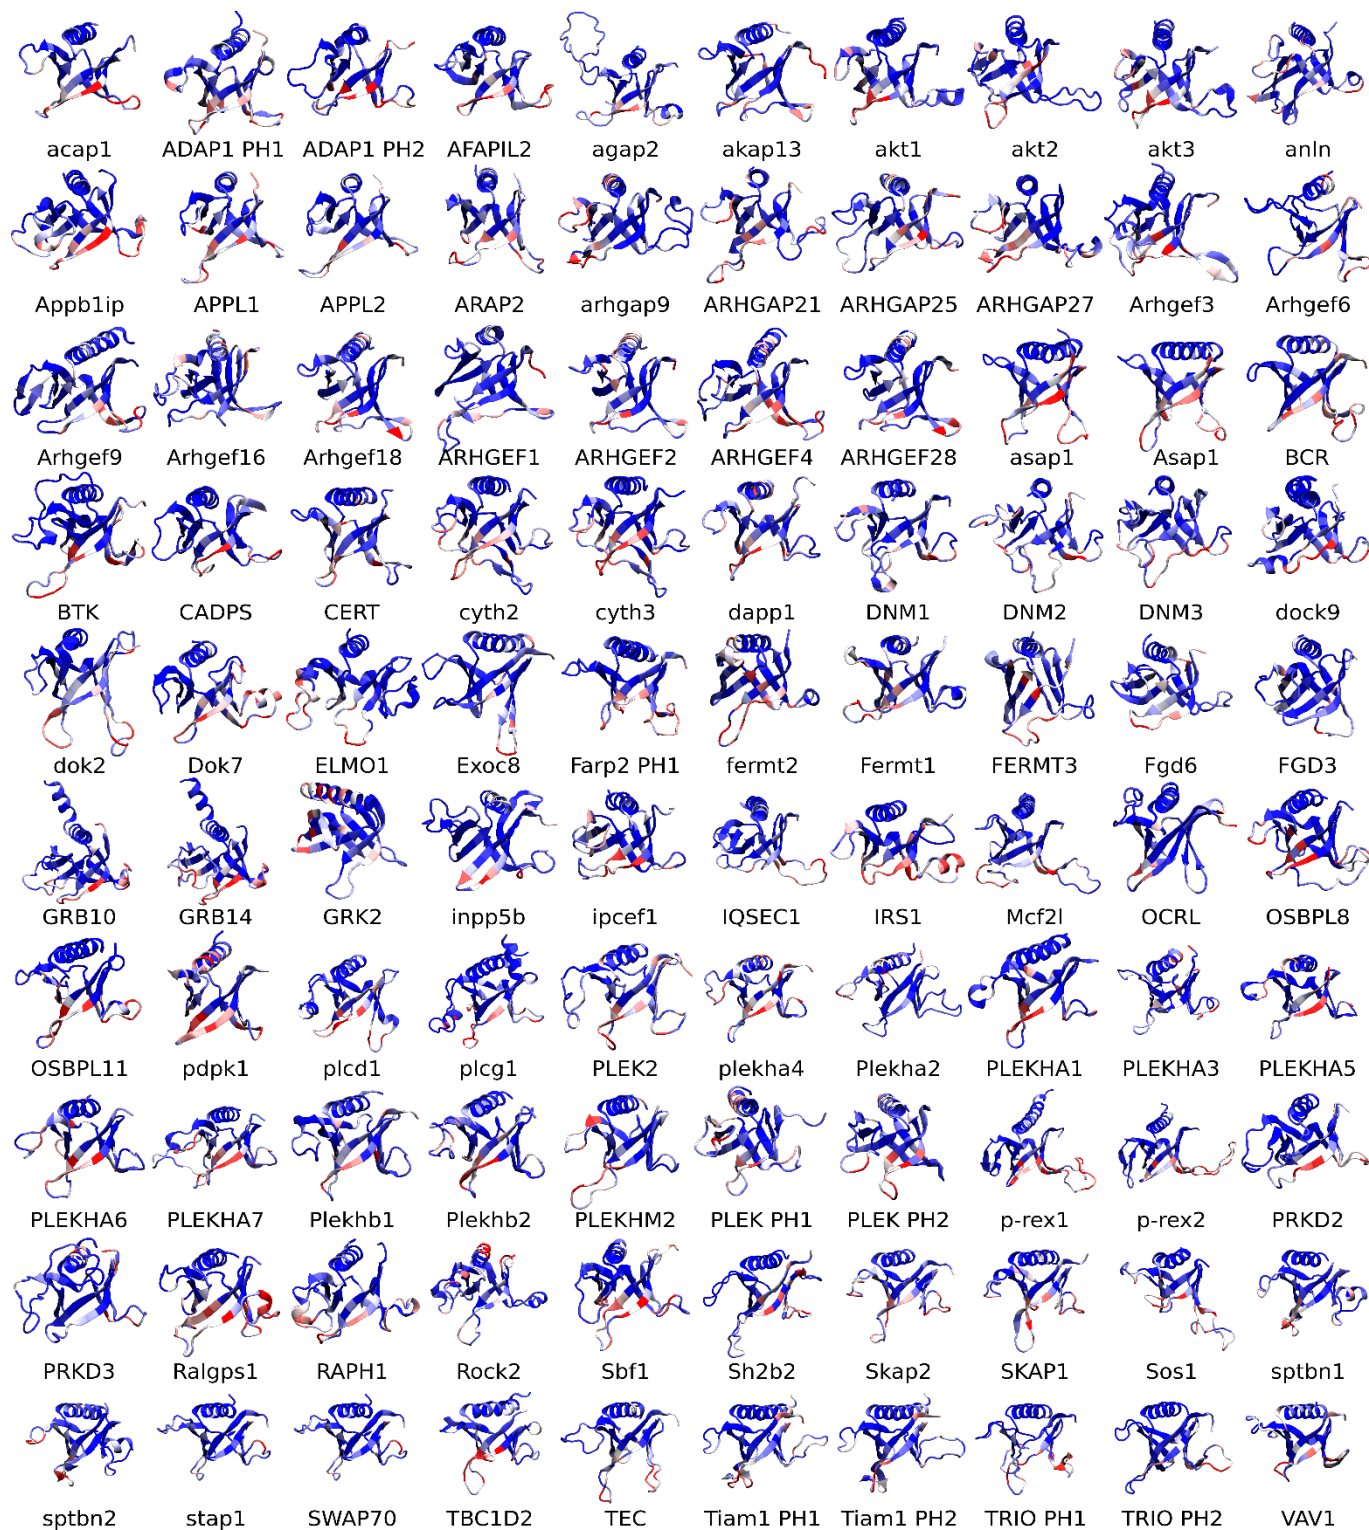

**Fig. S5. Structural comparison of PIP headgroup interaction hotspots on all simulated PH domains.** Structures of the 100 simulated PH domains where each residue is colored according to the normalized number of contacts observed between the protein and PIP<sub>2</sub> and PIP<sub>3</sub> headgroups during the final 200 ns of simulation, averaged over 20 replicates. Normalization was carried out by dividing the number of contacts at every residue by the maximum number of contacts that any residue in that PH domain made with PIP headgroups. The color scale is the same as in Fig. 2 and Fig. S4.

Fig. S6.

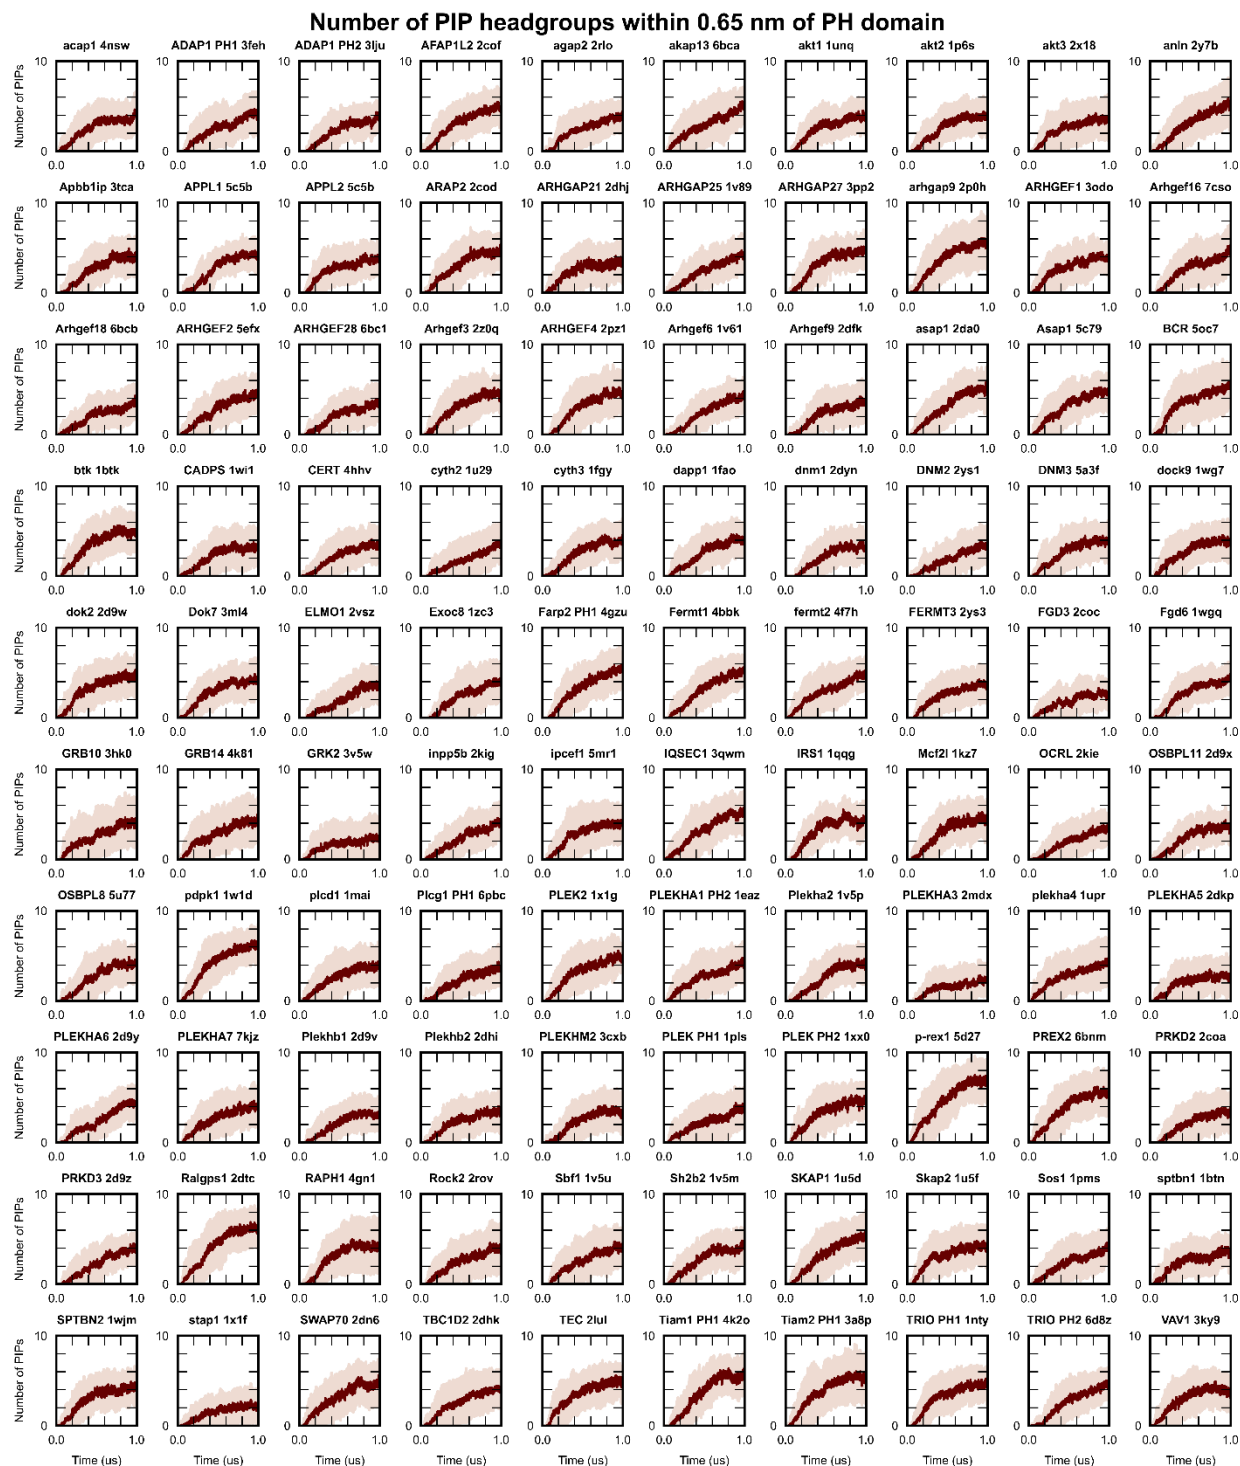

**Fig. S6. Association of multiple PIP lipids with PH domains following membrane binding.** The number of PO4 (CG representation of position 1 phosphate) particles of PIP<sub>2</sub> and PIP<sub>3</sub> lipids within a 0.65 nm cutoff distance of each PH domain during the course of simulations. The mean of 20 simulations is plotted in dark red, with pale red shading representing the interval  $\pm 1$  standard deviation of the mean for every PH domain.



**Fig. S7.**

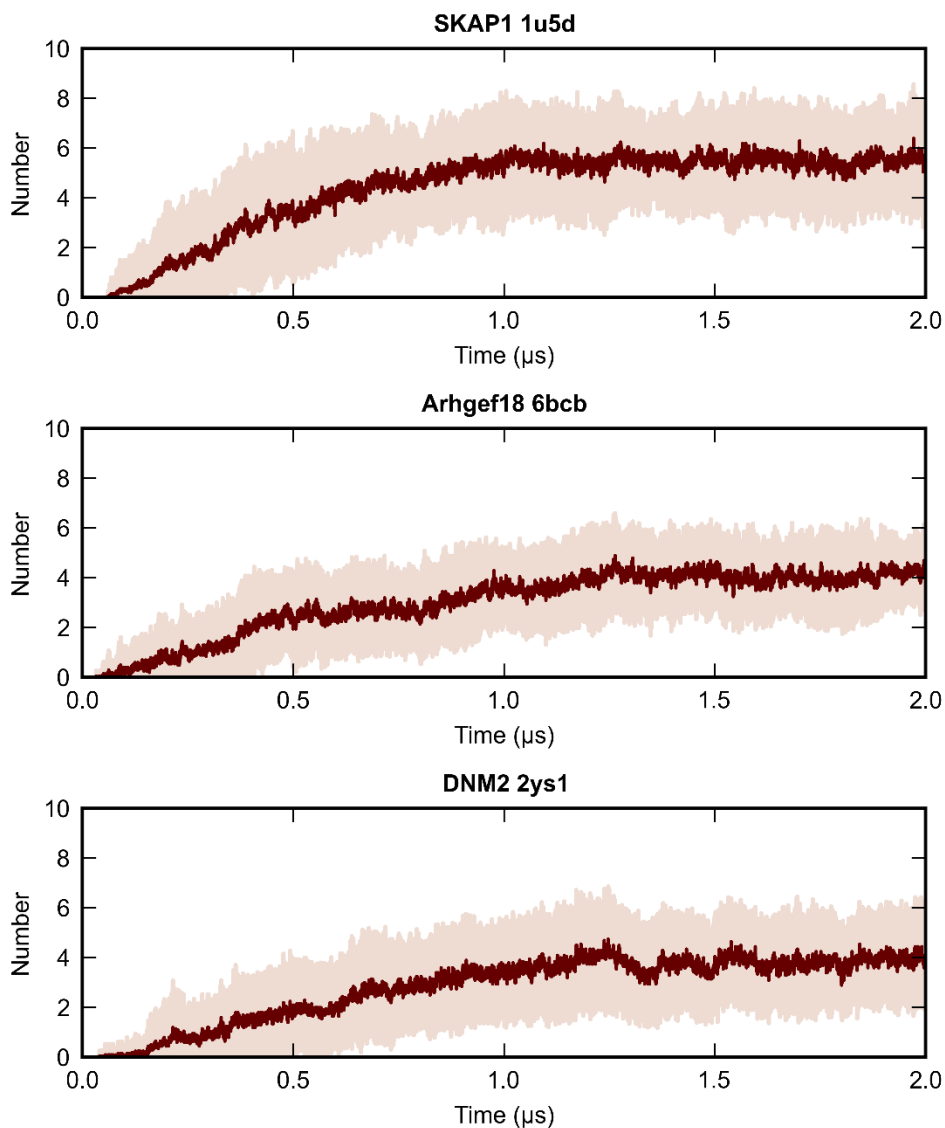

**Fig. S7. Number of PIP lipids associate with SKAP1, Arhgef18 and DNM2 PH domains.** The number of PO4 (CG representation of position 1 phosphate) particles of PIP<sub>2</sub> and PIP<sub>3</sub> lipids within a 0.65 nm cutoff distance of each PH domain during the course of simulations. The mean of 20 simulations is plotted in dark red, with pale red shading representing the interval  $\pm 1$  standard deviation of the mean for every PH domain. The number of PIPs associated after 2  $\mu$ s is similar to the number at 1  $\mu$ s.

**Fig. S8.**

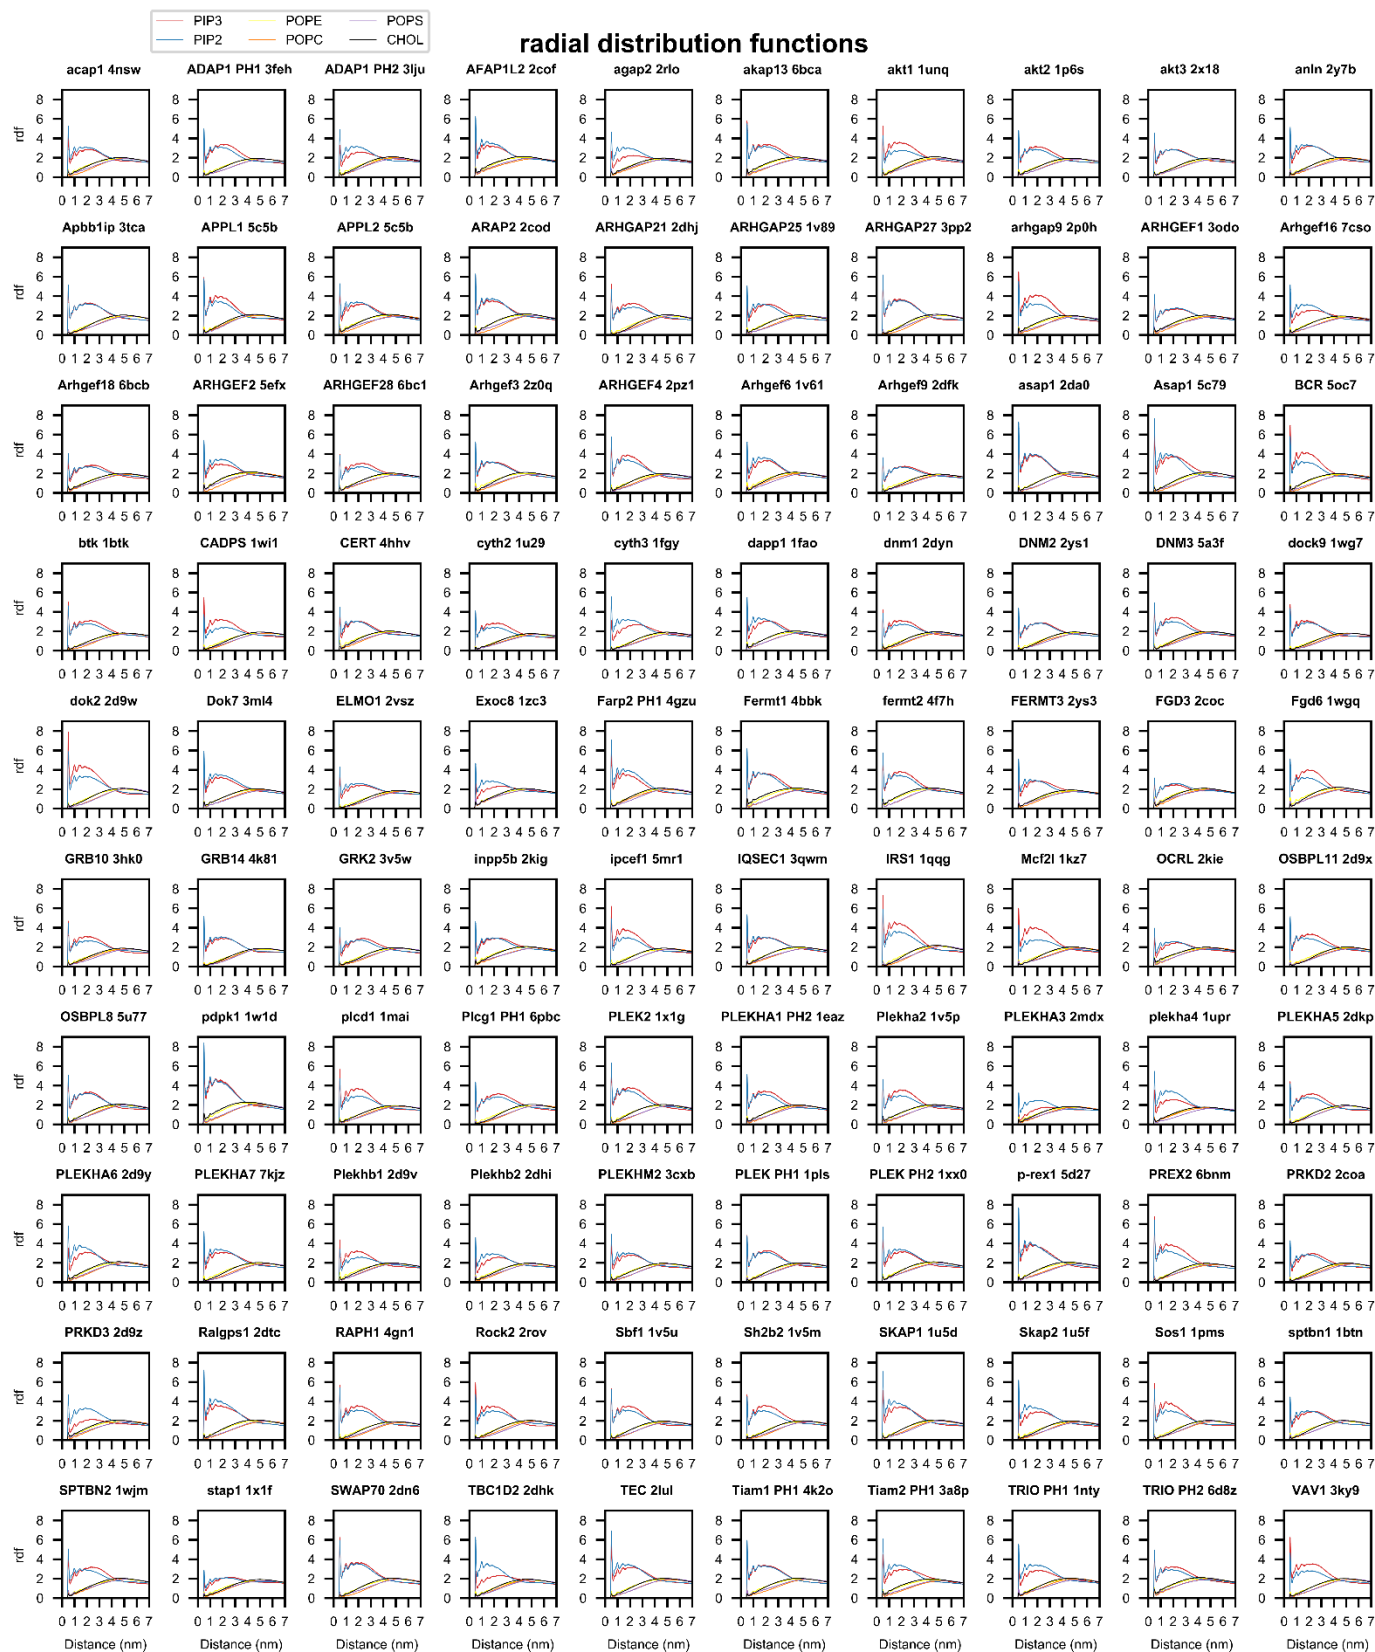

**Fig. S8. Lipid radial distribution functions around each PH domain demonstrate clustering of PIP lipids.** Radial distribution functions for the PO4 particles of each lipid species (PIP<sub>2</sub>: red, PIP<sub>3</sub>: blue, cholesterol: black, POPS: purple, POPE: yellow, POPC: orange) during the final 200 ns of simulation of all replicates for each PH domain for all simulated PH domains.

**Fig. S9.**

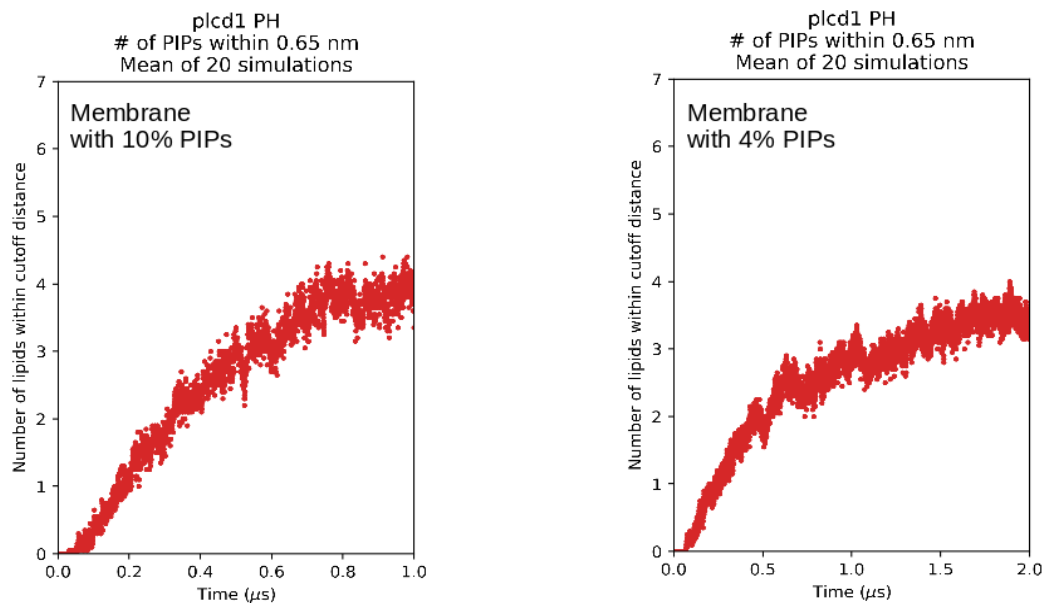

**Fig. S9. Association of multiple PIPs with the plcd1 PH domain in membranes with 10% and 4% PIP composition.** The number of PO4 (CG representation of position 1 phosphate) particles of PIP<sub>2</sub> and PIP<sub>3</sub> lipids within a 0.65 nm cutoff distance of the PH domain during simulations. The mean of 20 simulations is plotted in red.

**Fig. S10.**

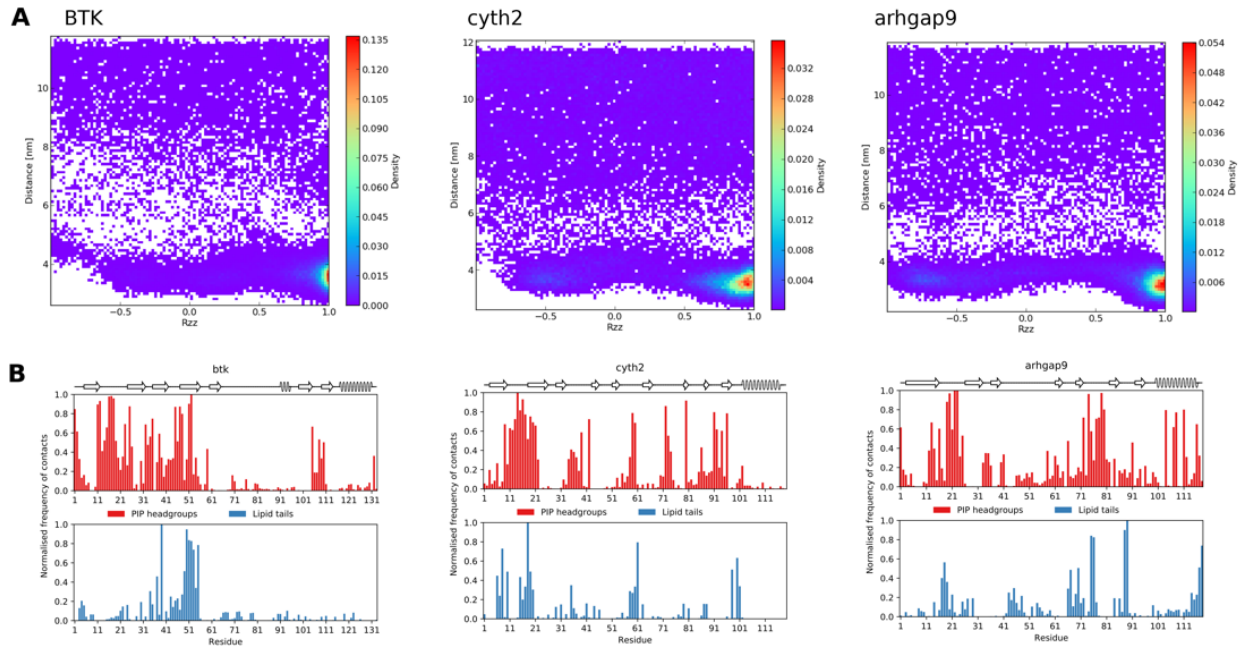

**Fig. S10. (A)** rotation-distance density matrices, and **(B)** normalized contacts between the protein and PIP<sub>2</sub> and PIP<sub>3</sub> headgroups (red), or phospholipid tails (blue) for the BTK, cyth2, arhgap9 PH domains.

**Fig. S11.**

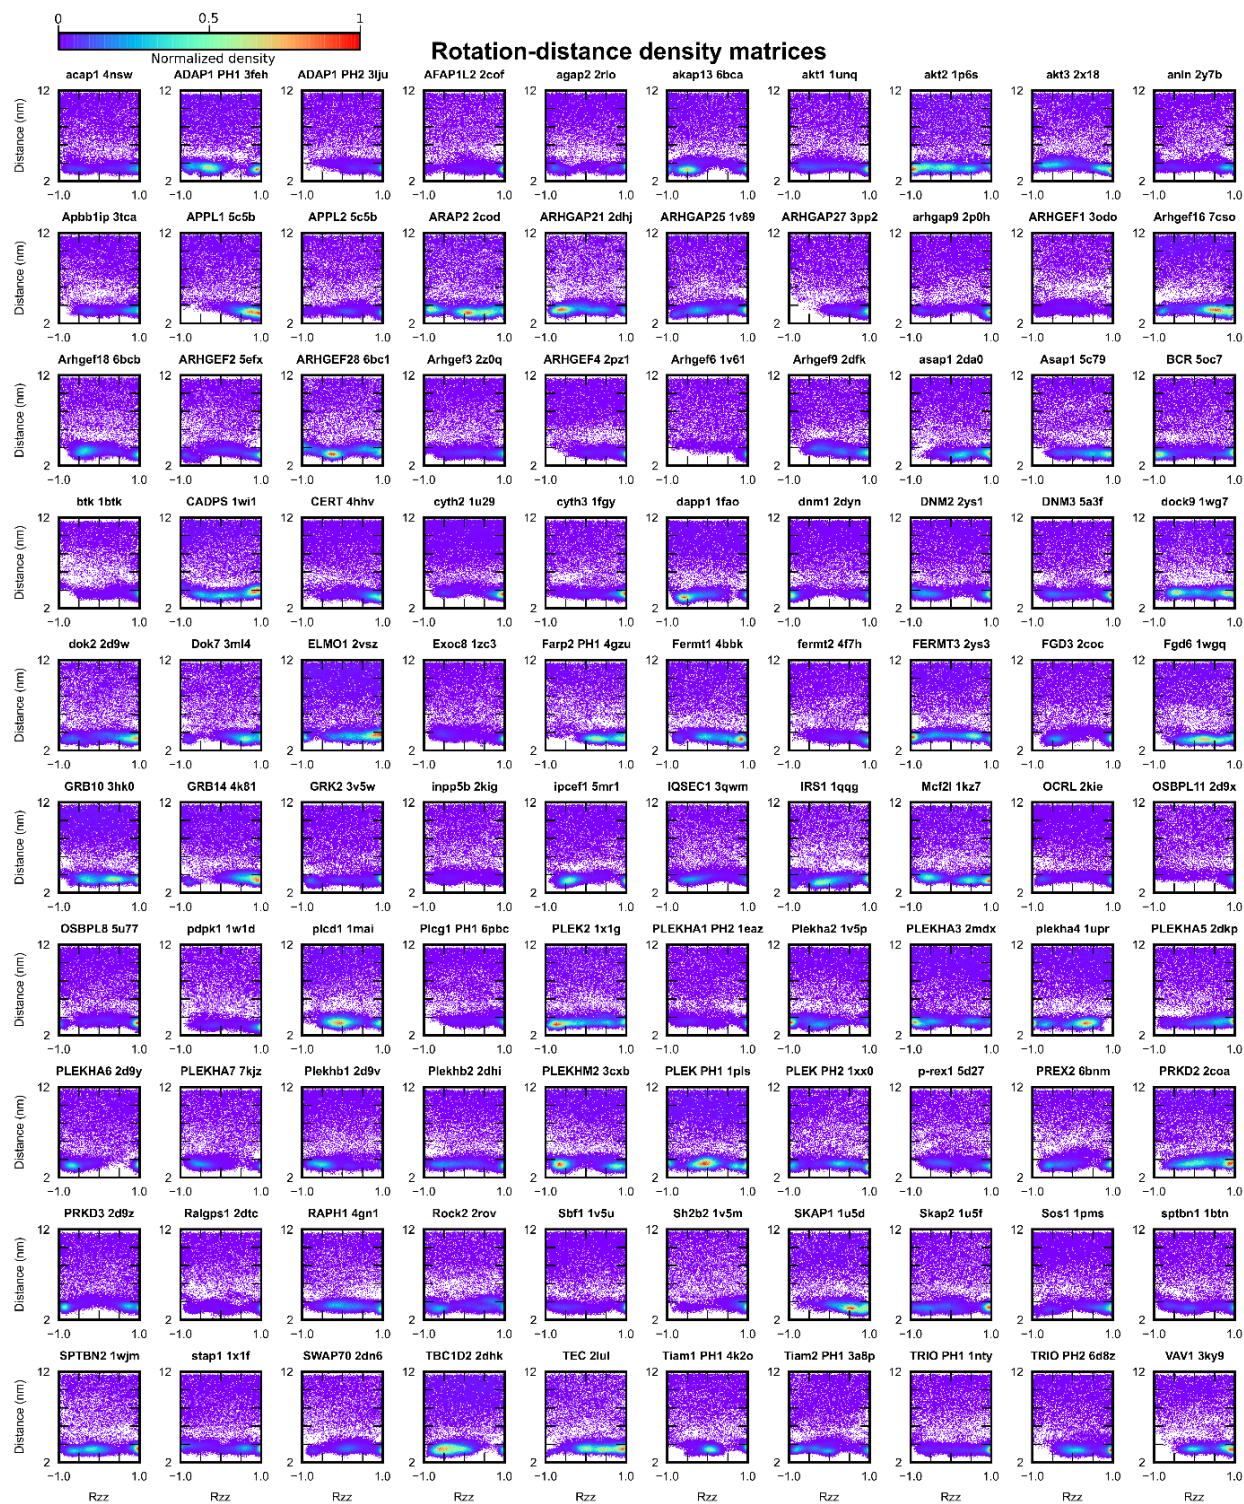

**Fig. S11. PH domains adopt preferred orientations on the membrane, as demonstrated by rotation-distance density matrices.** Each 2D histogram shows the density of protein-membrane z-distance and orientation states observed during simulation for each PH domain. The orientation was characterized by the Rzz component of the rotation matrix describing the transformation between an arbitrary reference orientation and the PH domain at each frame, corrected for periodic boundary conditions. Reference orientations differ for each PH domain.

**Fig. S12.**

**PIP2 and PIP3 headgroup contacts**

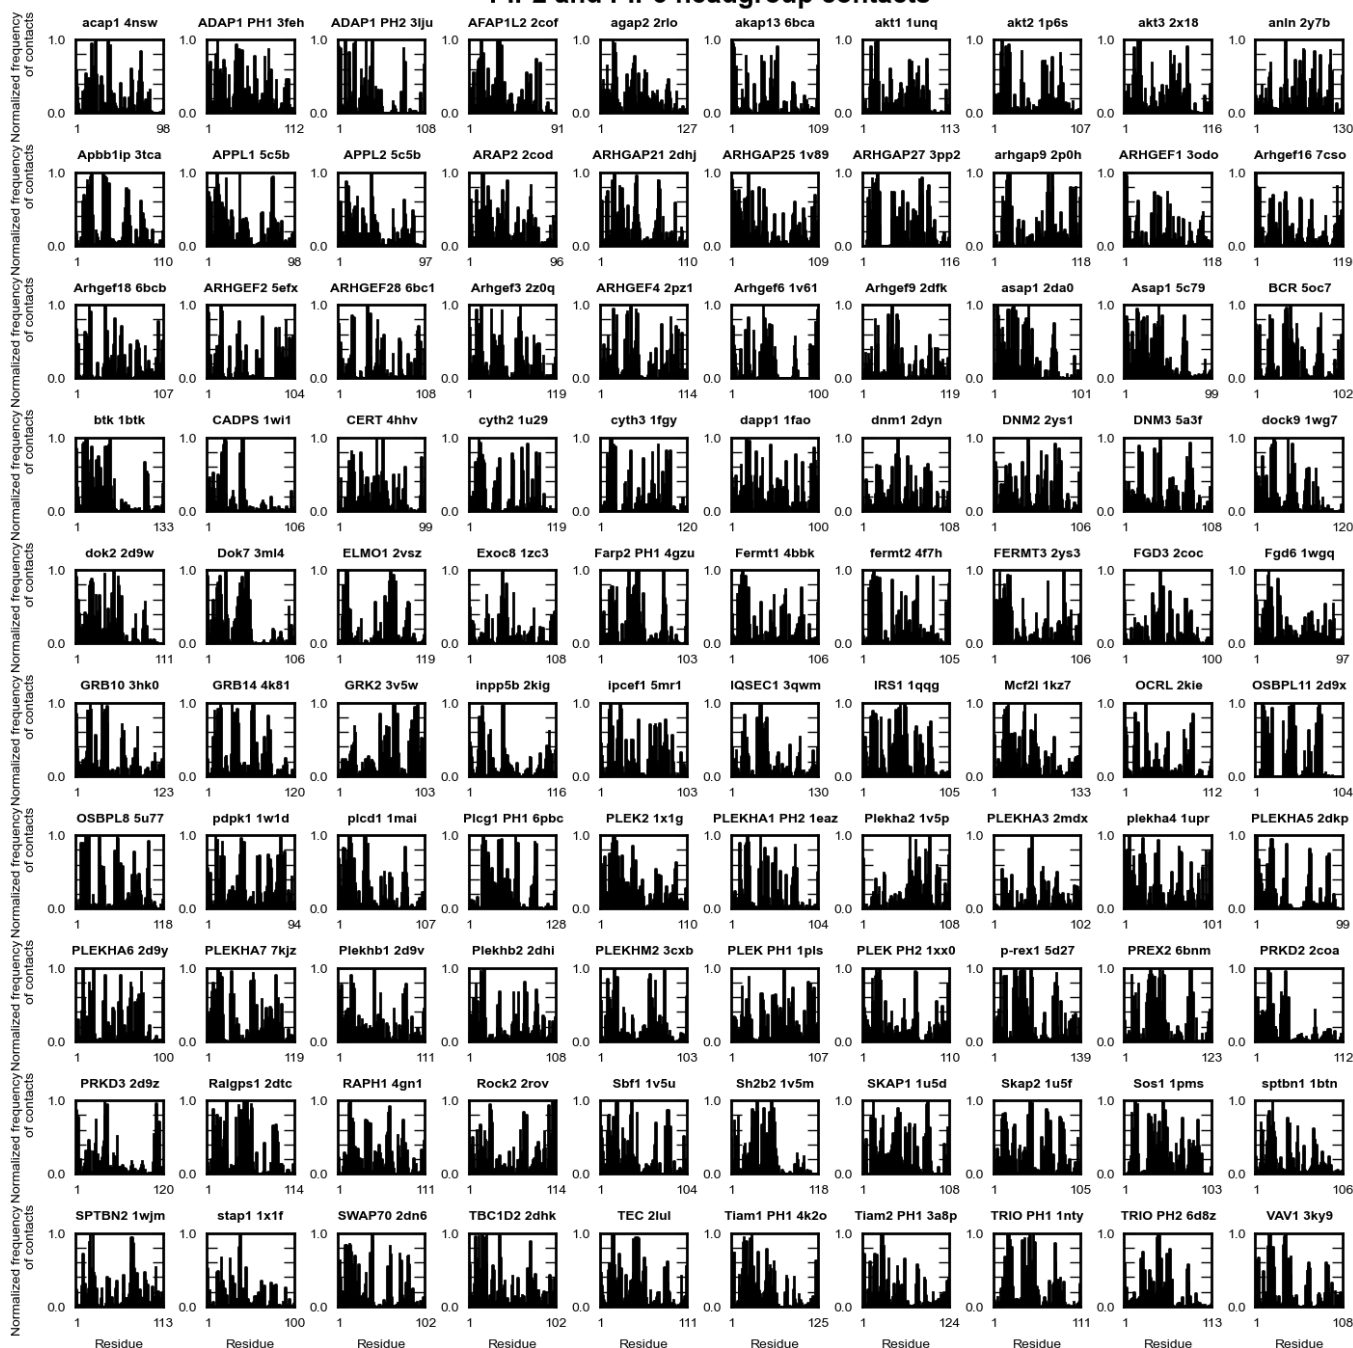

**Fig. S12. Normalized contacts between PIP<sub>2</sub>/PIP<sub>3</sub> headgroups and all residues of all PH domains.** One contact was counted at a residue for every frame in which a PIP<sub>2</sub> or PIP<sub>3</sub> headgroup particle was within a 5.5 Å cut-off distance of any particles of the residue. Contacts were summed over 20 repeat simulations, and then normalized for each PH by dividing the total contacts at each residue by the total contacts made by the residue with the highest number of contacts in that PH domain.

**Table S1.**

| <b>PH domain</b> | <b>PDB ID of structure coordinates used for simulation</b> |
|------------------|------------------------------------------------------------|
| acap1            | 4nsw                                                       |
| ADAP1 (PH1)      | 3feh                                                       |
| ADAP1 (PH2)      | 3lju                                                       |
| AFAP1L2          | 2cof                                                       |
| agap2            | 2rlo                                                       |
| akap13           | 6bca                                                       |
| akt1             | 1unq                                                       |
| akt2             | 1p6s                                                       |
| akt3             | 2x18                                                       |
| anln             | 2y7b                                                       |
| Apbb1ip          | 3tca                                                       |
| APPL1            | 5c5b                                                       |
| APPL2            | 5c5b                                                       |
| ARAP2            | 2cod                                                       |
| ARHGAP21         | 2dhj                                                       |
| ARHGAP25         | 1v89                                                       |
| ARHGAP27         | 3pp2                                                       |
| arhgap9          | 2p0h                                                       |
| ARHGEF1          | 3odo                                                       |
| Arhgef16         | 7cso                                                       |
| Arhgef18         | 6bcb                                                       |
| ARHGEF2          | 5efx                                                       |
| ARHGEF28         | 6bc1                                                       |
| Arhgef3          | 2z0q                                                       |
| ARHGEF4          | 2pz1                                                       |
| Arhgef6          | 1v61                                                       |
| Arhgef9          | 2dfk                                                       |
| asap1            | 2da0                                                       |
| Asap1            | 5c79                                                       |
| BCR              | 5oc7                                                       |
| btk              | 1btk                                                       |
| CADPS            | 1wi1                                                       |
| CERT             | 4hhv                                                       |
| cyth2            | 1u29                                                       |
| cyth3            | 1fgy                                                       |
| dapp1            | 1fao                                                       |
| dnm1             | 2dyn                                                       |
| DNM2             | 2ys1                                                       |
| DNM3             | 5a3f                                                       |
| dock9            | 1wg7                                                       |
| dok2             | 2d9w                                                       |
| Dok7             | 3ml4                                                       |
| ELMO1            | 2vsz                                                       |

|               |      |
|---------------|------|
| Exoc8         | 1zc3 |
| Farp2 (PH1)   | 4gzu |
| Fermt1        | 4bbk |
| fermt2        | 4f7h |
| FERMT3        | 2ys3 |
| FGD3          | 2coc |
| Fgd6          | 1wgq |
| GRB10         | 3hk0 |
| GRB14         | 4k81 |
| GRK2          | 3v5w |
| inpp5b        | 2kig |
| ipcef1        | 5mr1 |
| IQSEC1        | 3qwm |
| IRS1          | 1qqg |
| Mcf2l         | 1kz7 |
| OCRL          | 2kie |
| OSBPL11       | 2d9x |
| OSBPL8        | 5u77 |
| pdpk1         | 1w1d |
| plcd1         | 1mai |
| Plcg1 (PH1)   | 6pbc |
| PLEK2         | 1x1g |
| PLEKHA1 (PH2) | 1eaz |
| Plekha2       | 1v5p |
| PLEKHA3       | 2mdx |
| plekha4       | 1upr |
| PLEKHA5       | 2dkp |
| PLEKHA6       | 2d9y |
| PLEKHA7       | 7kjz |
| Plekha1       | 2d9v |
| Plekha2       | 2dhi |
| PLEKHM2       | 3cxb |
| PLEK (PH1)    | 1pls |
| PLEK (PH2)    | 1xx0 |
| p-rex1        | 5d27 |
| PREX2         | 6bnm |
| PRKD2         | 2coa |
| PRKD3         | 2d9z |
| Ralgps1       | 2dtc |
| RAPH1         | 4gn1 |
| Rock2         | 2rov |
| Sbf1          | 1v5u |
| Sh2b2         | 1v5m |
| SKAP1         | 1u5d |
| Skap2         | 1u5f |



|             |      |
|-------------|------|
| Sos1        | 1pms |
| sptbn1      | 1btn |
| SPTBN2      | 1wjm |
| stap1       | 1x1f |
| SWAP70      | 2dn6 |
| TBC1D2      | 2dhk |
| TEC         | 2lul |
| Tiam1 (PH1) | 4k2o |
| Tiam2 (PH1) | 3a8p |
| TRIO (PH1)  | 1nty |
| TRIO (PH2)  | 6d8z |
| VAV1        | 3ky9 |

**Table S1 – List of all simulated PH domains and the coordinate files used for simulation**
